# Supplementary material
Source: publisher site journal article supplement (https://www.dovepress.com/article/610759)
Supplement: Supplementary file 1 [file 610759%20Supplementary%20Material.docx]

**Supplementary Table S1.** Full search strategies and database-specific filters used in this review.

| **Database** | **Full search strategy** | **Filters / limits** |
| --- | --- | --- |
| **PubMed/MEDLINE** | ("Nanoparticles" OR "Nano-based") AND ("Root canal irrigant" OR "Antibiofilm") AND ("Dentin surface" OR "Biocompatibility") | English language; publication dates from 1 January 2015 to 31 December 2025 |
| **ScienceDirect** | ("Nanoparticles" OR "Nano-based") AND ("Root canal irrigant" OR "Antibiofilm") AND ("Dentin surface" OR "Biocompatibility") | English language; publication years 2015–2025; subject area: Medicine and Dentistry |

**Supplementary Table S2.** Primary reasons for exclusion of full-text studies after eligibility assessment.

| **Study** | **Primary reason for exclusion** |
| --- | --- |
| 1. **Shrestha et al. (2016) 19** | Nanoparticle application not evaluated as a root canal irrigant or final rinse (dentin-conditioning/regenerative NP system) |
| 1. **Akbari et al. (2017) 20** | Nanoparticle application not evaluated as a root canal irrigant or final rinse (PDT photosensitizer-carrier system) |
| 1. **Rosa et al. (2017) 21** | Did not evaluate a NP-based irrigation/disinfection strategy (PDT-centered protocol without a NP irrigant) |
| 1. **Souza et al. (2017) 22** | Did not evaluate a NP-based irrigation/disinfection strategy (PDT protocol without a NP irrigant) |
| 1. **Batinić et al. (2018) 23** | Did not evaluate a NP-based irrigation/disinfection strategy (PDT-based disinfection comparison, not an NP irrigant study) |
| 1. **Bukhari et al. (2018) 24** | Did not use extracted human teeth with natural root canal anatomy (prepared dentin-block model) |
| 1. **Chávez-Andrade et al. (2019) 16** | Did not use extracted human teeth with natural root canal anatomy (bovine dentin/root dentine model) |
| 1. **Daood et al. (2019) 25** | Did not evaluate a NP-based irrigation/disinfection strategy (quaternary ammonium silane formulation) |
| 1. **Ioannidis et al. (2019) 26** | Did not use extracted human teeth with natural root canal anatomy (hemi-sectioned teeth with artificially created lateral canals) |
| 1. **Li et al. (2019) 27** | Nanoparticle application not evaluated as a root canal irrigant or final rinse (NP coating/microbubble delivery study) |
| 1. **Naseri et al. (2019) 28** | Nanoparticle application not evaluated as a root canal irrigant or final rinse (nano-calcium hydroxide intracanal medicament/microhardness study) |
| 1. **Savitha et al. (2019) 29** | Nanoparticle application not evaluated as a root canal irrigant or final rinse (intracanal medicament gel) |
| 1. **Daood et al. (2020) 30** | Did not evaluate a NP-based irrigation/disinfection strategy (quaternary ammonium silane formulation) |
| 1. **Marinković et al. (2020) 31** | Did not evaluate a NP-based irrigation/disinfection strategy (essential-oil irrigants) |
| 1. **Daood et al. (2021) 32** | Did not evaluate a NP-based irrigation/disinfection strategy (K21-E formulation; not a NP irrigant) |
| 1. **Hussein and Kishen (2021) 33** | Nanoparticle application not evaluated as a root canal irrigant or final rinse (immunomodulatory macrophage–fibroblast model) |
| 1. **Singh et al. (2022) 34** | Nanoparticle application not evaluated as a root canal irrigant or final rinse (wound-repair/macrophage-polarization model) |
| 1. **Minhaco et al. (2023) 35** | Did not use extracted human teeth with natural root canal anatomy (bovine-tooth model) |
| 1. **Teimoory et al. (2023) 36** | Did not evaluate a NP-based irrigation/disinfection strategy (silver diamine fluoride/NaOCl/ozone protocol) |
| 1. **Zhang et al. (2023) 37** | Not an endodontic root canal irrigation study (general antibacterial nanoconjugate study) |
| 1. **Jafari Semnani et al. (2024) 38** | Did not evaluate a NP-based irrigation/disinfection strategy (photosensitizer penetration/activation study) |
| 1. **Selvaraj et al. (2024) 39** | Not an endodontic root canal irrigation study (*S. mutans*/caries-biofilm focus) |
| 1. **Ci et al. (2025) 40** | Did not evaluate a NP-based irrigation/disinfection strategy (laser + nanobubble protocol; no NPs) |
| 1. **Hu et al. (2025) 41** | Not an endodontic root canal irrigation study (non-tooth model; non-endodontic pathogen focus) |
| 1. **Hwang et al. (2025) 42** | Did not evaluate a NP-based irrigation/disinfection strategy (Triton chemical irrigant; no NPs) |
| 1. **Ismael et al. (2025) 43** | Not an endodontic root canal irrigation study (general silver NP synthesis/antimicrobial study) |
| 1. **Jouhar et al. (2025) 44** | Retracted article |
| 1. **Nekkanti and Kaukab (2025) 45** | Nanoparticle application not evaluated as a root canal irrigant or final rinse (intracanal medicament in primary teeth) |
| 1. **Pradeep et al. (2025) 46** | Not an endodontic root canal irrigation study (carbon dots/bio-imaging study) |
| 1. **Rajan et al. (2025) 47** | Not an endodontic root canal irrigation study (periodontal/anti-biofilm chitosan–nisin spheres) |
| 1. **Rao et al. (2025) 48** | Nanoparticle application not evaluated as a root canal irrigant or final rinse (Ca(OH)₂-based intracanal medicament; dentin-block model) |
| 1. **Silva et al. (2025) 49** | Did not evaluate a NP-based irrigation/disinfection strategy (extended NaOCl protocol; no NPs) |
| 1. **Xu et al. (2025) 50** | Did not use extracted human teeth with natural root canal anatomy (hydroxyapatite-disk and dentin-disk model) |

NP: Nanoparticle, PDT: photodynamic therapy, K21-E: quaternary ammonium silane formulation, *S. mutans: Streptococcus mutans*, MB/rGO: methylene blue-functionalized reduced graphene oxide, Ca(OH)₂: calcium hydroxide, NaOCl: sodium hypochlorite

**Supplementary Table S3.** Study-level assessment of methodological quality domains in the included studies.

| **Study** | **Sample/model adequately described** | **Comparator/control groups adequate** | **Randomization/**  **allocation reported** | **Blinding reported** | **Nanoparticle characterization adequate** | **Outcome reporting complete** | **Statistical analysis appropriate** |
| --- | --- | --- | --- | --- | --- | --- | --- |
| 1. **Monzavi et al. (2015) 51** | Yes | Yes | Unclear | Unclear | Unclear | Yes | Yes |
| 1. **Afkhami et al. (2017) 52** | Yes | Yes | Yes | Unclear | Unclear | Yes | Yes |
| 1. **Chávez-Andrade et al. (2017) 53** | Yes | Yes | Unclear | Unclear | Yes | Yes | Yes |
| 1. **Shrestha et al. (2018) 54** | Yes | Yes | Unclear | Unclear | Unclear | Yes | Yes |
| 1. **Guo et al. (2021) 55** | Yes | Yes | Unclear | Unclear | Yes | Yes | Yes |
| 1. **Zhao et al. (2022) 56** | Yes | Yes | Unclear | Unclear | Yes | Yes | Yes |
| 1. **Yu et al. (2024) 57** | Yes | Yes | Unclear | Unclear | Yes | Yes | Yes |
| 1. **Alkhudhairy & AlRefeai (2024) 58** | Yes | Yes | Unclear | Unclear | Unclear | Yes | Yes |
| 1. **Ebrahim et al. (2024) 59** | Yes | Yes | Unclear | Unclear | Unclear | Yes | Yes |
| 1. **Khangwal et al. (2024) 60** | Yes | Yes | Yes | Unclear | Unclear | Yes | Yes |
| 1. **Alhamdan (2025) 61** | Yes | Yes | Unclear | Unclear | Unclear | Yes | Yes |
| 1. **Usta et al. (2025) 62** | Yes | Yes | Unclear | Unclear | Unclear | Yes | Yes |


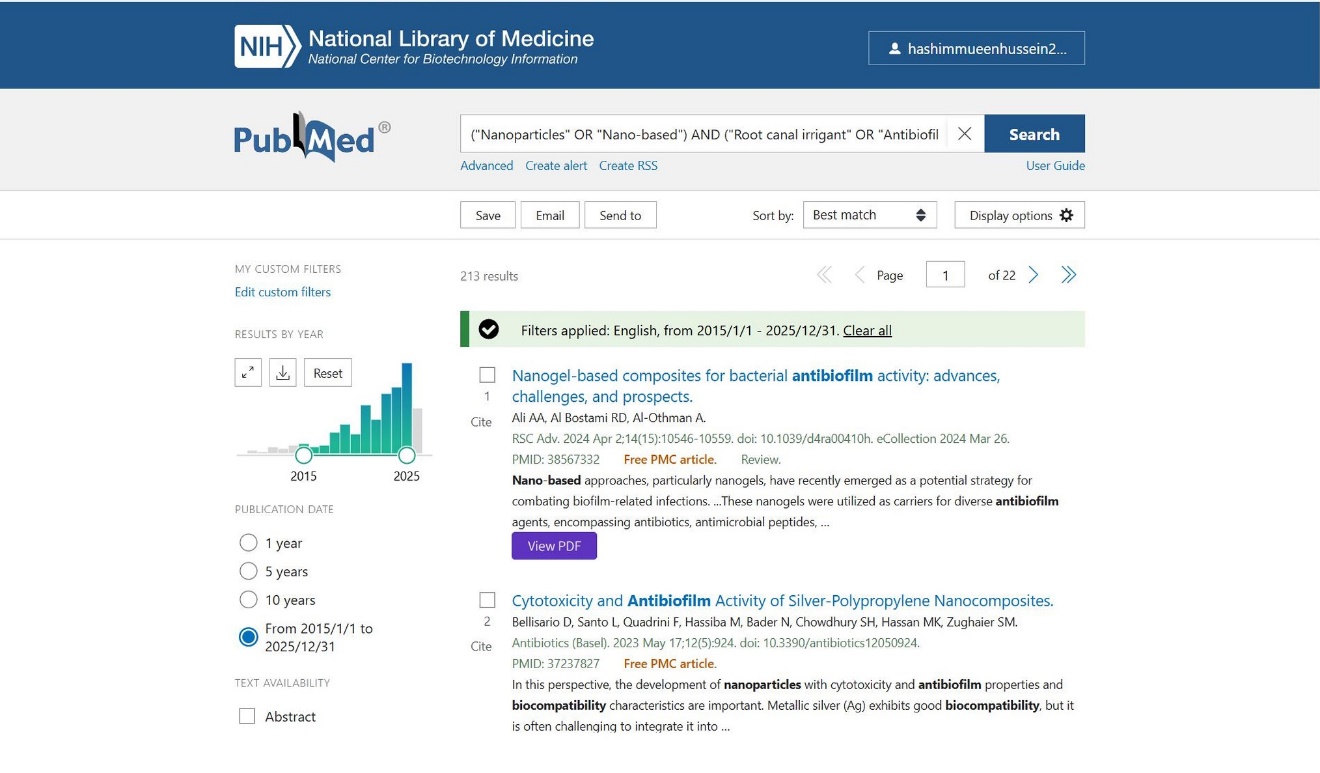


**Supplementary Fig S1.** PubMed/MEDLINE search results screenshot.


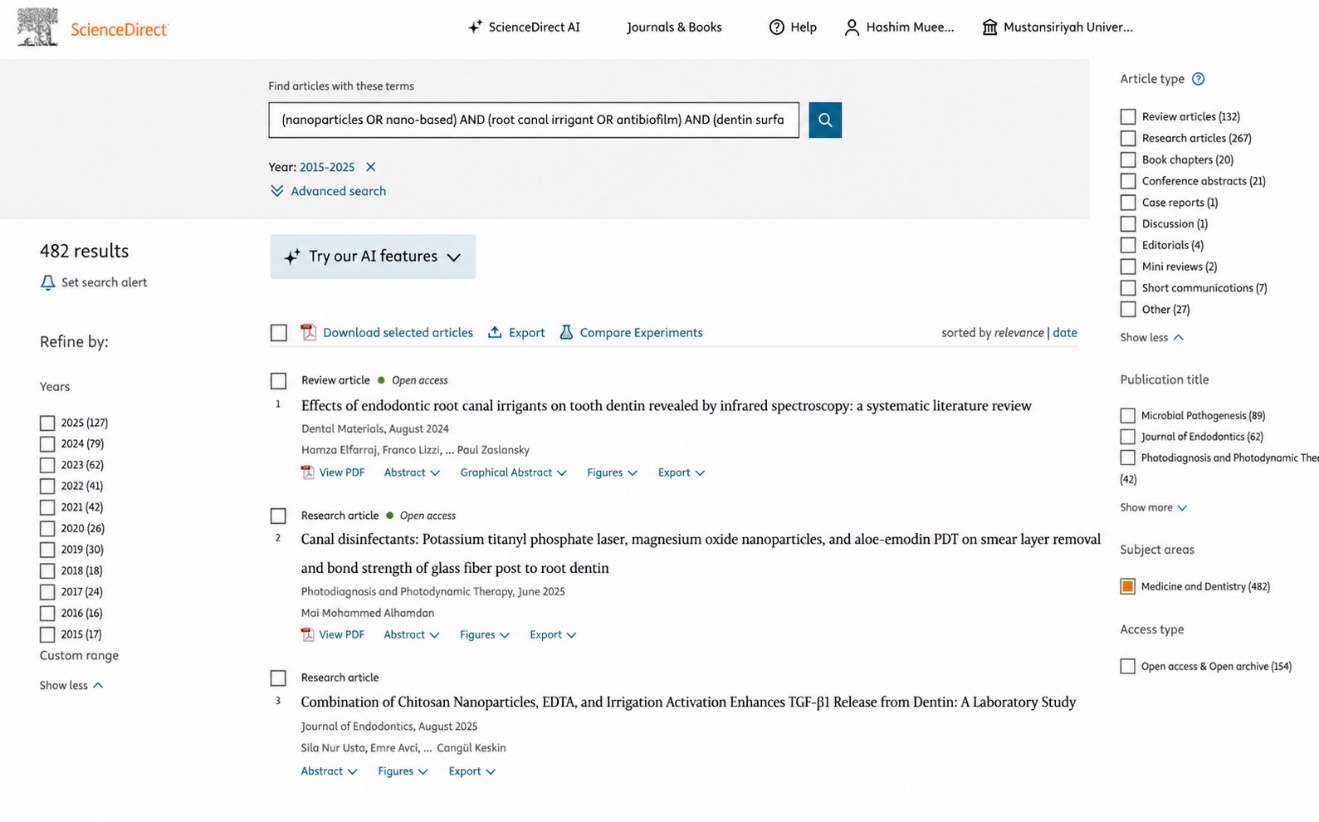


**Supplementary Fig S2.** ScienceDirect search results screenshot.


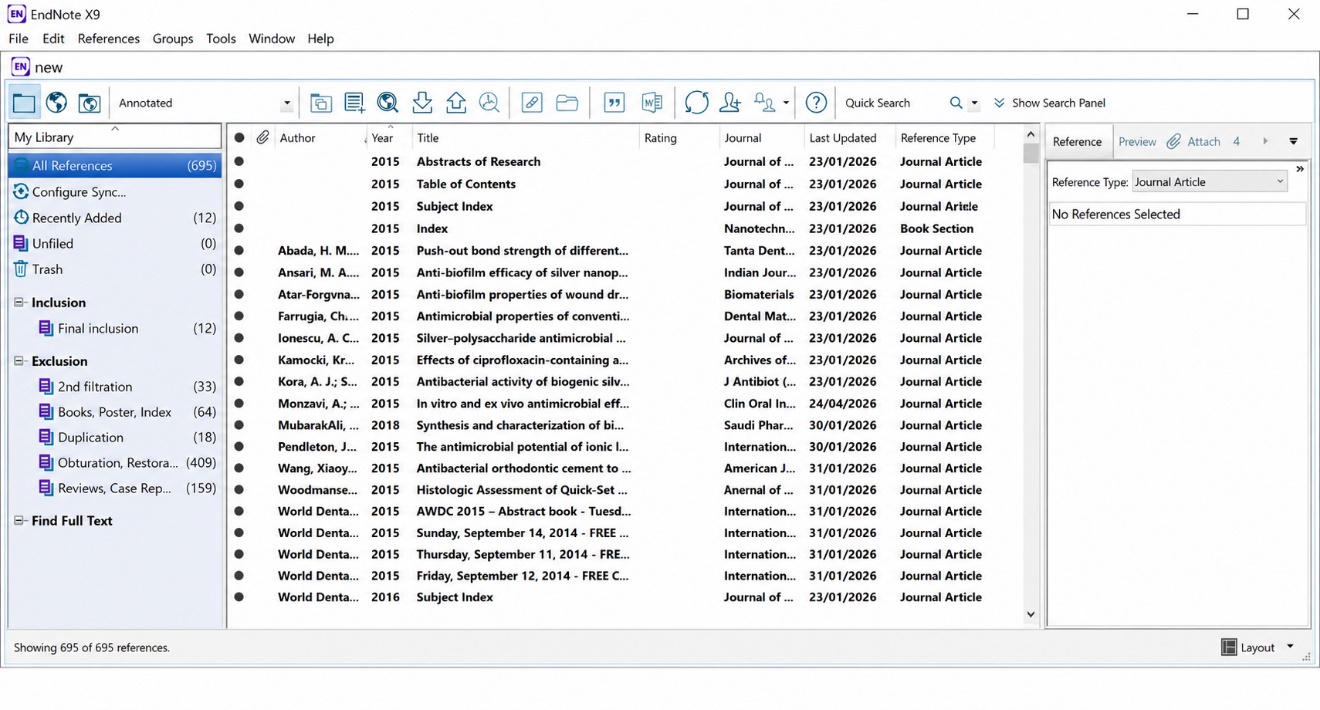


**Supplementary Fig S3.** EndNote duplicate-removal screenshot.

**Figure legends:**

**Supplementary Table S1.** Full search strategies and database-specific filters used in this review.

**Supplementary Table S2.** Primary reasons for exclusion of full-text studies after eligibility assessment.

**Supplementary Table S3.** Study-level assessment of methodological quality domains in the included studies.ity assessment.

**Supplementary Fig S1.** PubMed/MEDLINE search results screenshot.

**Supplementary Fig S2.** ScienceDirect search results screenshot.

**Supplementary Fig S3.** EndNote duplicate-removal screenshot.
